# Supplementary material for: Isolated reversible mydriasis was associated with the use of nebulized ipratropium bromide: a case series using quantitative pupilometer in Korea
Source: PubMed Central journal article supplement — Acute Crit Care. 2024 Nov 20;39(4):593–9. doi: 10.4266/acc.2024.00983 (PMC11617845; doi:10.4266/acc.2024.00983), 2024-11-20
Supplement: acc-2024-00983-Supplementary-Table-1.pdf [file acc-2024-00983-Supplementary-Table-1.pdf]

**Supplementary Table 1.** Pupillometer data from the individual patient at the time of anisocoria identification and recovery

| No. | Age (yr) | Sex | Identification of anisocoria |                          |               | After recovery of anisocoria |                          |               |
|-----|----------|-----|------------------------------|--------------------------|---------------|------------------------------|--------------------------|---------------|
|     |          |     | Pupil size (mm)              | Neurological Pupil Index | Latency (sec) | Pupil size (mm)              | Neurological Pupil Index | Latency (sec) |
| 1   | 69       | M   | 5.67                         | 3.4                      | 0.31          | 4.70                         | 4.4                      | 0.28          |
| 2   | 87       | F   | 4.87                         | 0                        | 0.42          | 3.50                         | 4.4                      | 0.28          |
| 3   | 20       | M   | 5.90                         | 0.6                      | 0.38          | 3.44                         | 2.1                      | 0.26          |
| 4   | 81       | F   | 4.31                         | 2.4                      | 0.37          | 2.21                         | 3.7                      | 0.4           |
| 5   | 57       | M   | 6.09                         | 0                        | 0.43          | 2.86                         | 3.9                      | 0.33          |
